# Supplementary material for: SARS-CoV-2 Omicron: evasion of potent humoral responses and resistance to clinical immunotherapeutics relative to viral variants of concern
Source: Research Square preprint supplement (doi:10.21203/rs.3.rs-1207364/v1), 2022-01-11
Supplement: Supplementary file 1 [file 003ec29c0d9209b9cad58a2e.xlsx]

## Sheet: ID50w oAlpha
			IC50 values					Fold change relative to Ancestral
Sample ID		Vaccine	Ancestral	BETA	GAMMA	DELTA	OMICRON	Ancestral	BETA	GAMMA	DELTA	OMICRON
VPVL001	Naïve vaccinated	BNT162b2 x3	706.19	164.563	198.862	249.765	55.5323	1	4.29132	3.55115	2.82742	12.7167
VPVL002		BNT162b2 x3	572.963	84.6973	118.897	207.375	54.468	1	6.76483	4.819	2.76294	10.5193
VPVL004		BNT162b2 x3	331.85	116.084	142.578	418.901	41.0863	1	2.8587	2.3275	0.792191	8.07691
VPVL005		BNT162b2 x3	253.636	LoD	87.8285	316.664	35.1103	1		2.88785	0.800963	7.22398
VPVL006		BNT162b2 x3	363.026	136.886	108.791	171.316	50.2874	1	2.65203	3.3369	2.11904	7.21902
VPVL007		BNT162b2 x3	433.65	129.477	131.125	305.218	56.507	1	3.34924	3.30714	1.42079	7.67426
VPVL008		BNT162b2 x3	312.627	132.544	149.036	187.582	LoD	1	2.35866	2.09767	1.66662
VPVL009		BNT162b2 x3	470.835	102.041	145.772	314.163	23.553	1	4.61416	3.22993	1.4987	19.9904
VPVL010		BNT162b2 x3	635.134	135.78	147.391	332.996	32.2148	1	4.67766	4.30918	1.90733	19.7156
VPVL011		BNT162b2 x3	650.839	220.271	260.85	550.041	22.9367	1	2.95472	2.49507	1.18326	28.3755
VPVL012		BNT162b2 x3	470.849	102.031	144.735	347.155	20.7256	1	4.61474	3.25319	1.35631	22.7182
VPVL013		BNT162b2 x3	3281.17	1077.88	1014.95	3145.46	108.5	1	3.04408	3.23285	1.04315	30.2411
VPVL014		BNT162b2 x3	332.991	80.913	128.06	249.022	32.0389	1	4.11543	2.60028	1.3372	10.3934
VPVL015		BNT162b2 x3	1090.99	185.831	206.814	514.231	48.0912	1	5.87084	5.27519	2.12159	22.6858
VPVL016		BNT162b2 x3	650.041	102.696	148.999	392.855	35.9759	1	6.32976	4.36272	1.65466	18.0688
VPVL017		BNT162b2 x3	429.257	123.507	92.167	204.639	24.7567	1	3.47557	4.65739	2.09763	17.339
VPVL018		BNT162b2 x3	1595.39	276.419	345.157	730.654	72.1098	1	5.77166	4.62223	2.18352	22.1245
VPVL019		BNT162b2 x3	1280.42	137.071	178.25	461.89	41.6242	1	9.34127	7.18324	2.77212	30.7613
VPVL020		BNT162b2 x3	992.484	270.372	311.787	503.599	62.9449	1	3.67081	3.18321	1.97078	15.7675
VPVL021		BNT162b2 x3	220.479	LoD	78.1803	118.832	25.6895	1		2.82013	1.85538	8.58243
VPVL022		BNT162b2 x3	1636.6	414.534	237.747	616.526	71.4316	1	3.94806	6.8838	2.65456	22.9115
VPVL023		BNT162b2 x3	604.662	204.404	176.276	389.633	35.0246	1	2.95817	3.43019	1.55187	17.2639
VPVL024		BNT162b2 x3	4207.9	656.668	585.635	1121.1	142.679	1	6.40796	7.18519	3.75338	29.4921
VPVL025		BNT162b2 x3	195.299	LoD	87.0274	69.6975	21.9316	1		2.24411	2.80209	8.90489
VPVL026		BNT162b2 x3	405.787	144.738	182.297	257.604	47.0731	1	2.80359	2.22597	1.57523	8.62035
			NT50					IC50
			Ancestral	BETA	GAMMA	DELTA	OMICRON	Ancestral	BETA	GAMMA	DELTA	OMICRON
		Average titres (Boosters)	528.571	170.909	156.667	343.333	40.8333	774.634	227.246	216.368	487.076	48.4288
		Fold change (Boosters)	1	3.09271	3.37386	1.53953	12.9446	1	4.40333	3.82084	1.90835	16.9744
Supplementary Table 3:		Neutralization titres for sera from healthy donors 1 month post third vaccine dose.
