# Supplementary material for: SARS-CoV-2 Omicron: evasion of potent humoral responses and resistance to clinical immunotherapeutics relative to viral variants of concern
Source: Research Square preprint supplement (doi:10.21203/rs.3.rs-1207364/v1), 2022-01-11
Supplement: Supplementary file 3 [file 572779a23f85822a9590c226.xlsx]

## Sheet: ID50w oAlpha
									Timepoint (4 weeks post second dose)			ID50 (SARS CoV2 variants)
									Sample ID	Vaccine	Ancestral	DELTA	GAMMA	BETA	Omicron
									W001	ChAdOx1	640	360	160	160	LoD
									W002	BNT162b	320	160	160	160	LoD
									W003	ChAdOx1	160	80	80	80	LoD
									W004	ChAdOx1	160	80	80	80	LoD
									W005	ChAdOx1	320	80	160	160	20
									W006	ChAdOx1	320	80	80	80	LoD
									W007	BNT162b	640	160	320	160	LoD
									W008	ChAdOx1	160	80	80	80	LoD
									W009	ChAdOx1	320	160	160	160	20
									W010	BNT162b	640	160	160	160	LoD
									W011	BNT162b	320	160	160	160	LoD
									W012	BNT162b	640	160	160	160	LoD
									W013	BNT162b	320	160	160	160	LoD
									W014	BNT162b	640	320	320	160	20
									W015	ChAdOx1	640	80	160	80	LoD
									W016	ChAdOx1	160	80	160	80	20
									W017	BNT162b	640	320	160	160	LoD
								Supplementary Table S1: End-point titers for two dose BNT162b2 or ChAdOx1 nCoV-19 vaccine recipients one month post their 2nd dose.
